# Supplementary material for: Histone Demethylase KDM4C Is Required for Ovarian Cancer Stem Cell Maintenance
Source: Hindawi journal article supplement (doi:10.1155/2020/8860185), 2020-08-29

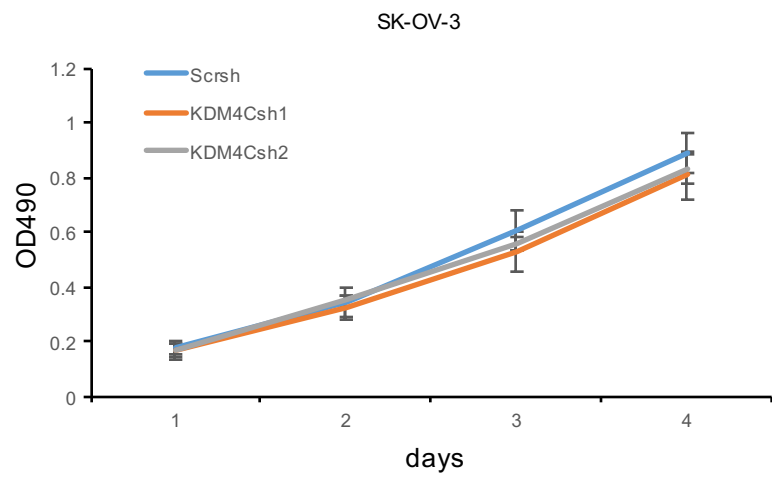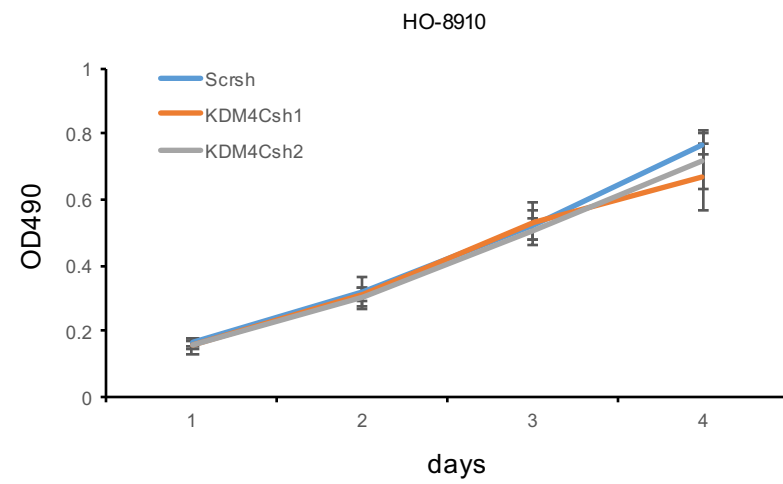

Supplement: f1 [file 8860185.f1.pdf]
